# Supplementary material for: Kinetic Determination of Acetylsalicylic Acid Using a CdTe/AgInS2 Photoluminescence Probe and Different Chemometric Models
Source: MDPI journal article supplement (doi:10.3390/bios13040437), 2023-03-30
Supplement: s1 [file s1]

# Kinetic Determination of Acetylsalicylic Acid Using a CdTe/AgInS<sub>2</sub> Photoluminescence Probe and Different Chemometric Models

Rafael C. Castro, Ricardo N. M. J. Páscoa \*, M. Lúcia M. F. S. Saraiva, João L. M. Santos and David S. M. Ribeiro \*

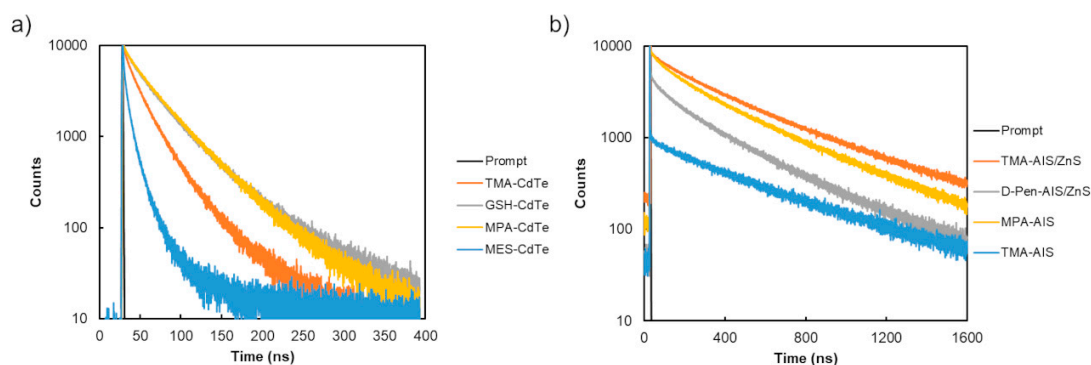

**Figure S1.** PL decay curves of (a) Cd-based binary and (b) Cd-free ternary QDs.

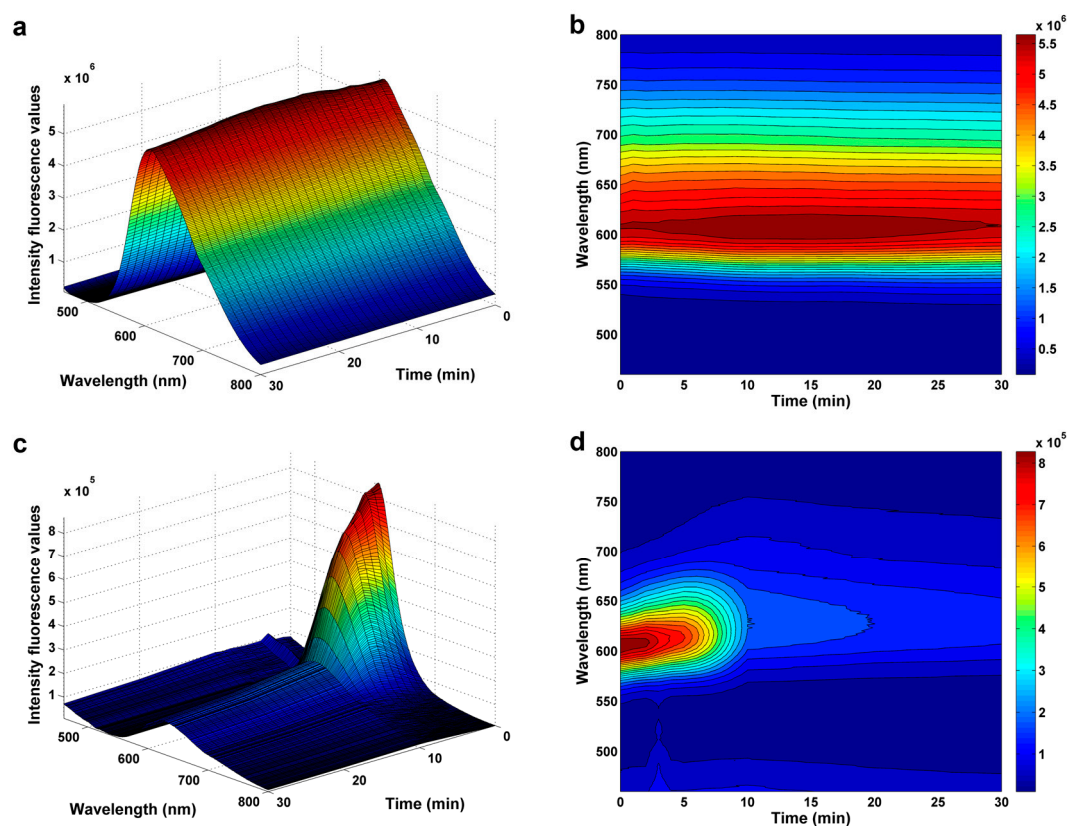

**Figure S2.** (a,c) Second-order data PL spectra of combined nanoprobe and (b) the corresponding plot of the fluorescence emission throughout 30 minutes; Second-order data PL spectra between combined nanoprobe and ASA standard of 35.6 mg L<sup>-1</sup>, and (b,d) the corresponding plot of the fluorescence emission as function of time and wavelength.
